# Supplementary material for: Emerging negative differential resistance effects and novel tunable electronic behaviors of the broken-gap KAgSe/SiC2 van der Waals heterojunction
Source: Royal Society of Chemistry journal article supplement (doi:10.1039/d0tc02100h), 2020-01-01
Supplement: d0tc02100h1.pdf [file d0tc02100h1.pdf]

**Supporting Information for**  
**Emerging Negative Differential Resistance (NDR) Effects and Novel**  
**Tunable Electronic Behaviors of the Broken-gap KAgSe/SiC<sub>2</sub> *van der***  
***Waals* Heterojunction**

Qiang Wang <sup>a,b,c</sup>, Yan Liang <sup>d</sup>, Hui Yao <sup>a</sup>, Jianwei Li <sup>a</sup>, Bin Wang <sup>a,\*</sup> and Jian Wang <sup>a,e\*</sup>

<sup>a</sup> *Shenzhen Key Laboratory of Advanced Thin Films and Applications, College of Physics and Optoelectronic Engineering, Shenzhen University, Shenzhen, 518060, People's Re- public of China.*

<sup>b</sup> *Key Laboratory of Optoelectronic Devices and Systems of Ministry of Education and Guangdong Province, College of Optoelectronic Engineering, Shenzhen University, Shen- zhen 518060, China.*

<sup>c</sup> *School of Materials Science and Engineering, Hanshan Normal University, Chaozhou 521041, China.*

<sup>d</sup> *School of Physics, State Key Laboratory of Crystal Materials, Shandong University, Jinan, 250100, People's Republic of China.*

<sup>e</sup> *Department of Physics and the Center of Theoretical and Computational Physics, The University of Hong Kong, Pokfulam Road, Hong Kong, China.*

**\*Corresponding Authors:**

[binwang@szu.edu.cn](mailto:binwang@szu.edu.cn);

[jianwang@hku.hk](mailto:jianwang@hku.hk)

## Supplementary Figures

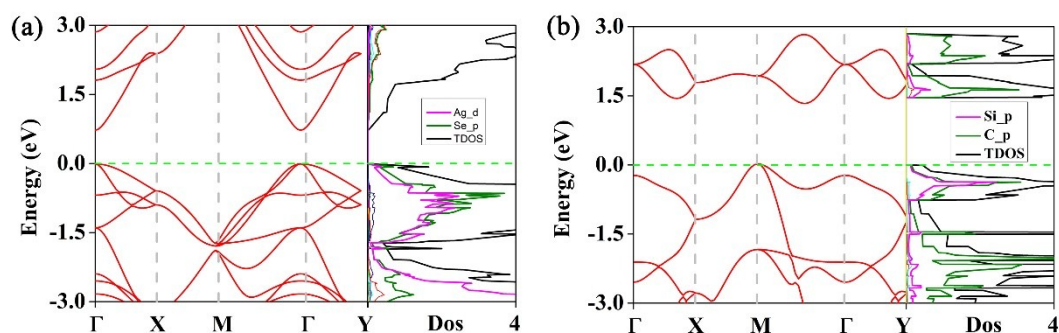

Figure S1. (color online) Band structures and PDos of (a) KAgSe and (b) SiC<sub>2</sub> at PBE level. In each panel, the Fermi level is set to zero.

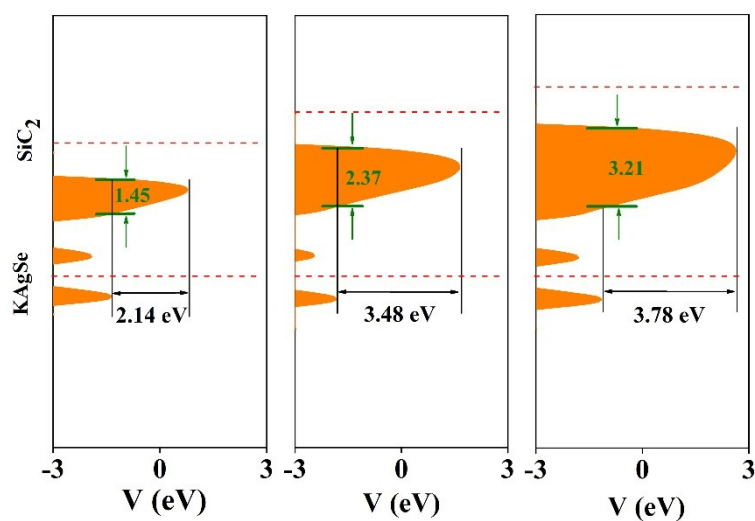

Figure S2. Electrostatic potential ( $V$ ) and potential barrier ( $\delta V$ ) at the different interfacial distances of 3.6 Å, 3.0 Å and 2.4 Å. The red horizontal dot dashed lines represent the position of the monolayer of KAgSe and SiC<sub>2</sub>.
